# Supplementary material for: A composite of ultra-fine few-layer MoS2 structures embedded on N,P-co-doped bio-carbon for high-performance sodium-ion batteries
Source: Royal Society of Chemistry journal article supplement (doi:10.1039/c9nj05921k), 2020-01-01
Supplement: c9nj05921k1.pdf [file c9nj05921k1.pdf]

### Supporting Information

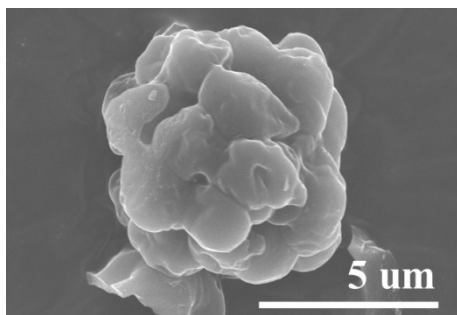

Fig. S1 The SEM image of the N/P-C.

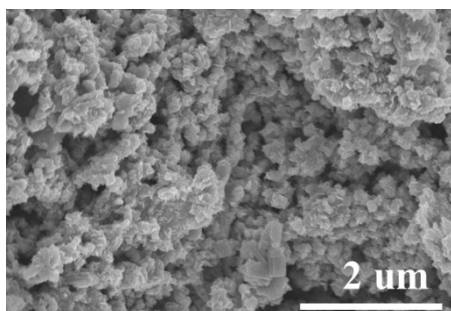

Fig. S2 The SEM image of the bulk MoS<sub>2</sub>.

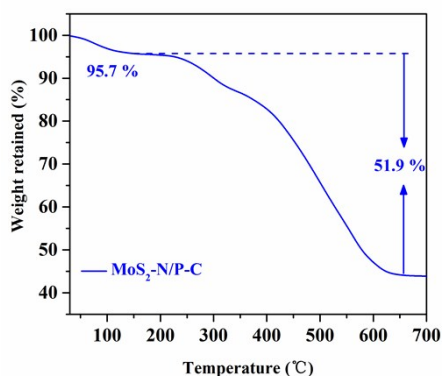

Fig. S3 The TGA curve of MoS<sub>2</sub>-N/P-C obtained in an air flow at a heating rate of 10 °C min<sup>-1</sup> from room temperature to 700 °C.

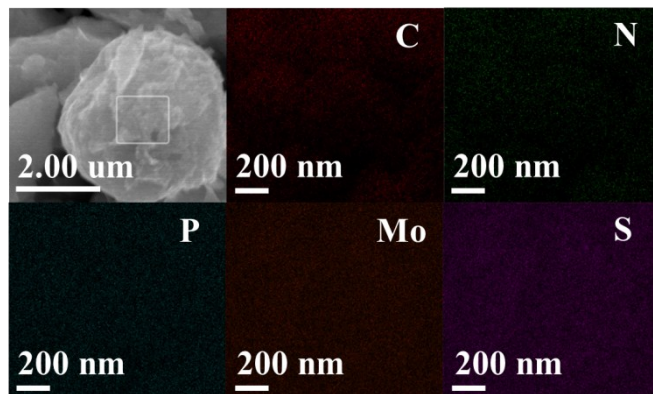

Fig. S4 Element mapping images of MoS<sub>2</sub>-N/P-C from Energy Dispersive X-Ray Spectroscopy.

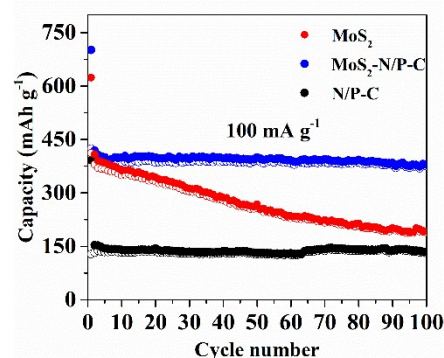

Fig. S5 Cyclic performances of the bulk MoS<sub>2</sub>, N/P-C and MoS<sub>2</sub>-N/P-C electrodes at current density of 100 mA g<sup>-1</sup>.

Table S1 The elemental contents of MoS<sub>2</sub>-N/P-C composite.

| Element | Weight % |
|---------|----------|
| C       | 35.9     |
| N       | 5.6      |
| P       | 10.3     |
| Mo      | 30.2     |
| S       | 18.0     |

Table S2 Comparison of selected performance metrics of MoS<sub>2</sub> SIBs electrodes.

| Electrode materials      | Specific capacity (mAh g <sup>-1</sup> ) | Current density (A g <sup>-1</sup> ) | Number of cycles | Ref. |
|--------------------------|------------------------------------------|--------------------------------------|------------------|------|
| BD-MoS <sub>2</sub>      | 272                                      | 5                                    | 1000             | S1   |
| MoS <sub>2</sub> /NSG-AG | 320                                      | 0.5                                  | 500              | S2   |
| MoS <sub>2</sub> /C-NR   | 385                                      | 0.5                                  | 350              | S3   |

|                            |         |     |      |           |
|----------------------------|---------|-----|------|-----------|
| Ex-MoS <sub>2</sub> /RGO@C | 415     | 0.1 | 150  | S4        |
| MoS <sub>2</sub> @CF       | 240     | 1   | 500  | S5        |
| MoS <sub>2</sub> /C        | 340/320 | 2/4 | 600  | S6        |
| FM-HPCF                    | 234     | 1   | 3000 | S7        |
| S/MoS <sub>2</sub>         | 413     | 0.1 | 100  | S8        |
| NW-MoS <sub>2</sub> @rGO   | 289     | 2   | 500  | S9        |
| G@MoS <sub>2</sub> -C      | 253     | 3   | 4500 | S10       |
| MoS <sub>2</sub> -N/P-C    | 172     | 5   | 2000 | This work |

S1. K. Yao, Z. Xu, J. Huang, M. Ma, L. Fu, X. Shen, J. Li and M. Fu, *Small*, 2019, **15**, 1805405.

S2. G. Yang, X. Li, Y. Wang, Q. Li, Z. Yan, L. Cui, S. Sun, Y. Qu and H. Wang, *Electrochim. Acta*, 2019, **293**, 47-59.

S3. J. K. Kim, S.-K. Park, J.-S. Park and Y. C. Kang, *J. Mater. Chem. A*, 2019, **7**, 2636-2645.

S4. M. Feng, M. Zhang, H. Zhang, X. Liu and H. Feng, *Carbon*, 2019, **153**, 217-224.

S5. Z.-H. Zhao, X.-D. Hu, H. Wang, M.-Y. Ye, Z.-Y. Sang, H.-M. Ji, X.-L. Li and Y. Dai, *Nano Energy*, 2018, **48**, 526-535.

S6. J. Wu, Z. Lu, K. Li, J. Cui, S. Yao, M. Ihsan-ul Haq, B. Li, Q.-H. Yang, F. Kang, F. Ciucci and J.-K. Kim, *J. Mater. Chem. A*, 2018, **6**, 5668-5677.

S7. L. Zeng, F. Luo, X. Chen, L. Xu, P. Xiong, X. Feng, Y. Luo, Q. Chen, M. Wei and Q. Qian, *Dalton Trans.*, 2019, **48**, 4149-4156.

S8. Z. Xu, K. Yao, Z. Li, L. Fu, H. Fu, J. Li, L. Cao and J. Huang, *J. Mater. Chem. A*, 2018, **6**, 10535-10542.

S9. H. Chen, T. Song, L. Tang, X. Pu, Z. Li, Q. Xu, H. Liu, Y. Wang and Y. Xia, *J. Power Sources*, 2020, **445**, 227271.

S10. C. Zhao, C. Yu, B. Qiu, S. Zhou, M. Zhang, H. Huang, B. Wang, J. Zhao, X. Sun and J. Qiu, *Adv. Mater.*, 2018, **30**, 1702486.
